# Supplementary material for: Chemotherapy resistance and stemness in mitotically quiescent human breast cancer cells identified by fluorescent dye retention
Source: Springer Nature journal article supplement (doi:10.1007/s10585-018-9946-2), 2018-10-30
Supplement: MOESM4 [file 16238168]

**Supplementary Table 1. Gene Assays in the Qiagen Custom RT<sup>2</sup> Profiler PCR Array**

| <b>Gene Symbol</b> | <b>Ref Seq No.</b> | <b>Description</b>                                    | <b>Catalogue Number</b> |
|--------------------|--------------------|-------------------------------------------------------|-------------------------|
| BMP1               | NM_006129          | Bone morphogenetic protein 1                          | PPH00515B               |
| CDH1               | NM_004360          | Cadherin 1, type 1, E-cadherin (epithelial)           | PPH00135F               |
| CDH2               | NM_001792          | Cadherin 2, type 1, N-cadherin (neuronal)             | PPH00636F               |
| CTNNB1             | NM_001904          | Catenin (cadherin-associated protein), beta 1, 88kDa  | PPH00643F               |
| EGFR               | NM_005228          | Epidermal growth factor receptor                      | PPH00138B               |
| FZD7               | NM_003507          | Frizzled family receptor 7                            | PPH02420B               |
| JAG1               | NM_000214          | Jagged 1                                              | PPH06022B               |
| NOTCH1             | NM_017617          | Notch 1                                               | PPH00526C               |
| SMAD2              | NM_005901          | SMAD family member 2                                  | PPH01949F               |
| SNAI2              | NM_003068          | Snail homolog 2 (Drosophila)                          | PPH02475A               |
| TGFB1              | NM_000660          | Transforming growth factor, beta 1                    | PPH00508A               |
| TGFB2              | NM_003238          | Transforming growth factor, beta 2                    | PPH00524B               |
| TGFB3              | NM_003239          | Transforming growth factor, beta 3                    | PPH00531F               |
| VIM                | NM_003380          | Vimentin                                              | PPH00417F               |
| WNT5B              | NM_032642          | Wingless-type MMTV integration site family, member 5B | PPH02447C               |
| ACTB               | NM_001101          | Actin, beta                                           | PPH00073G               |
| B2M                | NM_004048          | Beta-2-microglobulin                                  | PPH01094E               |
| GAPDH              | NM_002046          | Glyceraldehyde-3-phosphate dehydrogenase              | PPH00150F               |
| HPRT1              | NM_000194          | Hypoxanthine phosphoribosyltransferase 1              | PPH01018C               |
| RPLP0              | NM_001002          | Ribosomal protein, large, P0                          | PPH21138F               |
| HGDC               | SA_00105           | Human Genomic DNA Contamination Control               | PA-031                  |
| RTC                | SA_00104           | Reverse Transcription Control                         | PPX63340                |
| PPC                | SA_00103           | Positive PCR Control                                  | PPX63339                |
